# Supplementary material
Source: publisher site journal article supplement (https://www.dovepress.com/article/563659)
Supplement: Supplementary file 1 [file 563659_Supplementary_Material%20CLEAN.docx]

**Supplementary Material**

**The search string for our search in the data base for MEDLINE is indicated here exemplary, and was adapted to the other data bases to meet their operator identification system:**

*Routine care AND ((((adherence OR acceptability OR compliance OR appropriateness OR concordance) AND ("response rate" OR dropout OR "reply rate" OR "time points" OR follow-up OR attrition)) AND (PROM OR "quality of life" OR "health-related quality of life" OR HRQol OR "patient-reported outcome" OR "health status" OR "health outcomes" OR PRO OR "patient-centered outcome")) AND ("digital device" OR "digital technology" OR device OR "digital interventions" OR smartphone OR tablet OR computer OR pc OR laptop OR app OR mheath OR e-health OR epros OR eprom OR electronic device))*

**Supplementary Table**

**Table S1** studies considered in the full-text review

| Study | Research Question | Main Topic | Sample | Setting | Study Type | Main Outcomes | Reason for exclusion | |
| --- | --- | --- | --- | --- | --- | --- | --- | --- |
| Altmann et al., 20031 | To utilize m-health solutions for monitoring an individual’s HRQoL in clinical settings involving routine patient-doctor interactions | Technology acceptance | N = 47  Age mean = 35 (SD = 9)  Female n = 27  Relapsing multiple sclerosis n = 43 | routine multiple sclerosis care | Longitudinal Feasibility study | Adherence to monthly completion of PRO questionnaires; patient satisfaction using the app | WO | |
| Appleyard et al., 20212 | To explore the feasibility of collecting electronic patient-reported outcomes (ePROs) in a population of older men with prostate cancer and varying levels of digital experience | Technology acceptance | N = 40  Age mean = 74 (range 58–89)    men with prostate cancer | Data collection took place in an outpatient setting, complemented by a substudy focusing on remote completion. | Feasibility study | Acceptance of ePROs over the paper-and-pencil version, both in the clinic and from home | WO | |
| Bergqvist et al., 20203 | To develop and investigate a patient interactive digital support (an app) for patients on adjuvant endocrine breast cancer treatment | Development | N = 15  Age 41–78  women with breast cancer | Routine cancer care | Pilot study | App usability | WO | |
| Basch et al., 20124 | An effectiveness guidance document for the Center of Medical Technology Policy for the inclusion of PROs in clinical comparative effectiveness research in adult oncology | Implementation | n.a. | Clinical comparative effectiveness trials | Review article | Recommendations on the selection of measures, implantation and data analysis and reporting of PROs | WP, WO | |
| Basch et al., 20225 | Evaluation of the benefits of electronic symptom monitoring during cancer treatment on QoL | Technology acceptance | N = 1191  Age = 62.2 (28-93)  Female, n = 694 (58.3%) | 52 community oncology practices in the US randomized 1:1 to control or intervention | Multicenter cluster RCT | Patients in the PRO group showed significant improvements in physical functioning, symptom control and HRQoL at 3 months compared with the control group. | WO | |
| Basch et al., 20236 | Editorial on a study describing the chances and pitfalls of the implementation of electronic PROs for symptom monitoring during cancer care | Implementation | n.a. | Routine care | Editorial | Review of the PROs by the medical team, weekly cadence for assessments, staff engagement and integration of the PRO assessment into the EHR system are crucial success factors. | WP, WO | |
| Bhatt et al., 20207 | To implement ePROs into a standard of care at a major tertiary academic medical center | Implementation | N = 1151  Age mean = 66  (Range 17- 95 years)  Joint arthroplasty patients | Real world setting in a department of orthopedic surgery | Implementation study | Completion rate over time for PRO domains | WO | |
| Chang et al., 20218 | To examine the feasibility of a pilot Population Approach of Health program and its impact on clinical and process-of-care outcomes | Technology acceptance | N = 12760  Age mean = 39.7 (SD = 14.3)  Patients with depression | Routine depression care | Prospective observational study | PHQ-9 scores to evaluate the health program | WO | |
| Daliya et al., 20229 | To pilot the use of a digital platform to facilitate the routine collection of pre- and post-operative electronic PROMs (ePROMs) in participants undergoing elective laparoscopic cholecystectomy | Technology acceptance | N = 200  Age mean = 46.2 (SD= 14.3)  Female n = 163  Male n = 37  Patients with laparoscopic cholecystectomy | Routine laparoscopic cholecystectomy care | Feasibility study | pre-post comparison of HRQoL | WO | |
| Eisenstadt et al., 202110 | To describe the acceptability, engagement, and preliminary outcomes of using an app (Paradym) designed to promote emotional well-being and positive mental health | Technology acceptance | N = 115  Age 18-65+  Female n = 78  Male n = 29  Transgender n = 2  Other n = 7 | Online recruitment via social media | pre-post, mixed-methods, single-arm evaluation | Content, functionality and usability of the app | WO | |
| Girigis et al., 201711 | To test acceptance and feasibility of a PRO assessment system (PROMPT-Care) in oncology care | Technology acceptance | N = 35  Age M = 62.23 (39-85)  Female, n = 24 (69%) | Routine care | Mixed-methods feasibility trial | Feasible and highly acceptable PRO assessment system  **Note**: Patients’ feedback suggested a clarification of instructions and instrument time frames and a simplification of response option for one instrument. | WO | |
| Girigis et al., 201912 | To provide guidance on PRO selection, scoring interpretation and response to PROs above threshold using the PROMPT-Care system in oncology care | Other | n.a. | Routine care | Method description | Guideline on the PRO assessment including instrument selection, scoring interpretation and response recommendations | WO | |
| Hage et al., 202213 | To test the feasibility of an application-based PRO monitoring for breast cancer patients | Technology acceptance | N = 11  Age M = 47 (31-70)  Female, n = 11 | Routine care | Single-arm pilot study | Necessary improvements on app functionalities  **Note**: 5 patients found the questions only moderately relevant for them. | WO | |
| Hoffmann et al., 201914 | To (a) test the feasibility of using mental health applications to augment integrated primary care services; (b) solicit feedback from patients and providers to guide implementation, and (c) develop a mental health apps toolkit for system-wide dissemination | Implementation | N = 56 patients  Age mean = 36.5  Female n = 37  N = 32 behavioral health staff | Routine care | Feasibility study | Usability of interventional apps | WO | |
| Kanakubo et al., 202215 | To examine patient acceptability of making self-assessments of their health conditions using a tablet computer-based questionnaire and identify associations between acceptability and HRQoL | Technology acceptance | N = 54  Age mean = 55.6 (SD = 8.6) | Routine cancer care | Descriptive study | User interface, health assessment function, involvement with healthcare and influence on self-management  **Note:** During the interview, some participants stated that the number of questions was too high and that some were difficult to answer. Others remarked that they were aware of their health status even without the questionnaire. | WO | |
| Katzel et al., 202316 | To test the feasibility of weekly ePRO assessment for patients with head and neck cancer undergoing radiation therapy | Technology acceptance | N = 34  Age = 65  Female n = 7 | Routine care | Feasibility study | ePRO implementation is feasible | WO | |
| Lehmann et al., 202317 | To investigate adherence to and patient perceptions of a weekly, web-based PROM symptom monitoring program in routine clinical practice for patients with Multiple Myeloma | Technology acceptance | N = 39  Age mean = 63.2 (SD = 9.2)  Female = 15  Male = 24 | Routine cancer care | single-center longitudinal observational study | Adherence to the program, patient perceptions of the program, frequency of clinical alerts generated by the system | WO | |
| Mouillet et al., 202118 | To investigate compliance with a system for routine monitoring of HRQoL in cancer care | Implementation | N = 177  Age M = 62.2 (SD = 12.6)  Female n = 110 (62.1 %) | Routine care | Single-center prospective feasibility trial | High compliance rate with routine assessments | WO | |
| Michelsen et al., 202219 | To assess the effect of a web-based application designed to support adherence to lifestyle advice and self-control of risk factors (intervention) in addition to center-based cardiac rehabilitation, compared with cardiac rehabilitation only (usual care) | Technology acceptance | N = 150  *Control group* n = 49  Age mean = 61.1 (SD = 8.6)  male = 36  *Intervention group* n = 101  Age mean = 60 (SD = 8.9)  Male = 84 | cardiac rehabilitation | RCT | Efficacy of a web-based application | WSD, WO | |
| Penedo et al., 202220 | To test feasibility of electronic health record-  integrated symptom screening and needs assessment  in a racial/ethnically diverse ambulatory  oncology care setting | Implementation | 506 female patients in ambulatory gynecological oncology care  Age, median (IQR) = 59.8 (49.7-67.7) | Ambulatory oncology care | Feasibility study | The implantation of an EHR-integrated screening system was feasible and showed initial acceptability | WO | |
| Poulose et al., 202121 | To determine the effectiveness of a clinical call center in performing focused long-term patient reported outcome (PRO)-based follow-up for ventral hernia patients in routine practice | Implementation | N = 1000  Age median = 56  Female = 43 % | Routine ventral hernia patients care | Interventional study | The proportion of patients with successfully completed PRO-based long-term follow-up. | WO | |
| Richter et al., 202122 | To prove usability and feasibility for disease surveillance and App implementation in routine care | Implementation | N = 268  Age mean = 50.1 (SD = 13.1)  Female = 78.3 % | Routine rheumatology care | Proof-of-concept study | Difference between paper-based and electronic PROMS | WO | |
| Rogausch et al., 200923 | To test feasibility and acceptance of ePRO assessment of QoL in general practice | Implementation | N = 523  Age M = 61 (SD = 14)  Female n = 329 (63%) | General practice | Multi-center feasibility pilot study | Technical implementation was feasibile and usability of results was high | WO | |
| Schoenthaler et al., 202224 | To apply a systematic, user-centered design approach to develop a mobile PRO system for diabetes care | Development | 36 patients with type-II diabetes  14 primary care providers | Diabetes primary care | Development and usability study | Active involvement of end-users provided valuable insights for the refinement of the tool.  **Note**: this study provides insights of the patients’ preferences regarding clarity, timing, and frequency of the PRO assessments | WO | |
| Steinbauer et al., 201125 | To implement a QoL assessment for patients with non-melanoma skin cancer in routine care | Technology acceptance | N = 52  Age = 70 (35-89)  Female n = 18 (35%) | Routine care | monocenter, prospective observational  pilot study | Acceptance was high and implementation in routine care feasible | WO | |
| Väyrynen et al., 202326 | To investigate women’s perspectives on the future implementation of standard ICHOM-PCB-PRMs in routine maternity care in Finland | Development | N = 22 women | Routine maternity care | Qualitative study | Importance and relevance, time points of data collection, quality of questions, willingness to answer, expected benefits of implementing PROMs, possible difficulties or risks, preferred practices and conditions | WSD  **Note:** The development of PROMs was not within the scope of the review. | |
| Wiegel et al., 202327 | To investigate which patient factors and/  or timing of the invitation predicted response to ePROs sent prior to consultations in patients with rheumatoid arthritis | Technology acceptance | N = 3194  Age mean = 60 (SD = 14)  Female = 74 % | Registry study | retrospective cohort study | ePRO completion | WO | |
| Wong et al., 201728 | To assess acceptability and feasibility of a tablet-based ePRO system among patients with chronic kidney disease | Technology acceptance | N = 121  Age M = 58 (SD = 14)  Female n = 54 (45%) | Outpatient clinics, inpatient units and home care | Single-center pilot study | High acceptance for tablet-based PRO assessment. Assistance may be needed for older patients with low computer experience. | WO | |
| Wright et al., 200329 | To test the feasibility and acceptance of automated QoL assessment in oncology practice | Technology acceptance | Study 1:  N = 272  Age M = 53.94 (SD = 15.53)  Female n = 151 (55.5%) | Outpatient clinics at two centers | Prospective cohort study | The use of the system was feasible and compliance was better in the routine care setting than in the study setting. | WO |
| Study 2: N = 1,291  Age M = 56.56 (SD = 15.1)  Female n = 769 (59.6%) | In- and outpatient clinics at three centers | Routine care |
| Wujcik et al., 202230 | To test feasibility of an electronic patient symptom management program implemented during a  pandemic | Technology acceptance | N = 282  Age mean = 58.96 (SD = 13.18)  Male n = 41  Female n = 241  patients with cancer | Routine cancer care | Feasibility study | Adherence to electronic patient symptom management program | WO | |

Abbreviations: *EHR,* Electronic health record; *HRQoL,* health-related quality of life; *n.a.,* not applicable; *PRO-CTCAE*, Patient-Reported Outcomes Version of the Common Terminology Criteria for Adverse Events (National Cancer Institute); *SUS,* System Usability Score; *RCT,* randomized controlled trail*; WO,* Wrong Outcome*; WP,* Wrong Publication Type, *WSD*, wrong study design

# References

1. Altmann P, Ponleitner M, Monschein T, et al. Feasibility of a smartphone app to monitor patient reported outcomes in multiple sclerosis: The haMSter interventional trial. *Digital Health*. 2022;8:20552076221135387.

2. Appleyard SE, Larkin MJW, Stewart EM, Minton O, Gilbert DC. Digital Medicine in Men with Advanced Prostate Cancer – A Feasibility Study of Electronic Patient-reported Outcomes in Patients on Systemic Treatment. *Clinical Oncology*. 2021;33(12):751-760. doi:10.1016/j.clon.2021.04.008

3. Bergqvist J, Lundström S, Wengström Y. Patient interactive digital support for women with adjuvant endocrine therapy in order to increase compliance and quality of life. *Support Care Cancer*. 2021;29(1):491-497. doi:10.1007/s00520-020-05476-z

4. Basch E, Abernethy AP, Mullins CD, et al. Recommendations for incorporating patient-reported outcomes into clinical comparative effectiveness research in adult oncology. *Journal of clinical oncology*. 2012;30(34):4249-4255.

5. Basch E, Schrag D, Henson S, et al. Effect of electronic symptom monitoring on patient-reported outcomes among patients with metastatic cancer: a randomized clinical trial. *Jama*. 2022;327(24):2413-2422.

6. Basch E, Hudson K, Rocque G. *Implementation of Electronic Patient-Reported Outcomes for Symptom Monitoring during Cancer Treatment: The Importance of Getting It Right*. Vol 12. Becaris Publishing Ltd Royston, UK; 2023:e230157.

7. Bhatt S, Davis K, Manning DW, Barnard C, Peabody TD, Rothrock NE. Integration of patient-reported outcomes in a total joint arthroplasty program at a high-volume academic medical center. *JAAOS Global Research & Reviews*. 2020;4(5):e20.

8. Chang D, Carlo AD, Khor S, et al. Transforming population-based depression care: a quality improvement initiative using remote, centralized care management. *Journal of general internal medicine*. 2021;36(2):333-340.

9. Daliya P, Lobo D, Parsons S. Utilising Electronic PROMs to Measure a Change in Health Following Elective Laparoscopic Cholecystectomy: A Feasibility Study. *British Journal of Surgery*. 2021;108(Supplement_7):znab309.047. doi:10.1093/bjs/znab309.047

10. Eisenstadt A, Liverpool S, Metaxa AM, Ciuvat RM, Carlsson C. Acceptability, engagement, and exploratory outcomes of an emotional well-being app: mixed methods preliminary evaluation and descriptive analysis. *JMIR Formative Research*. 2021;5(11):e31064.

11. Girgis A, Durcinoska I, Levesque JV, et al. eHealth system for collecting and utilizing patient reported outcome measures for personalized treatment and care (PROMPT-Care) among cancer patients: mixed methods approach to evaluate feasibility and acceptability. *Journal of medical Internet research*. 2017;19(10):e330.

12. Girgis A, Durcinoska I, Arnold A, Delaney GP. Interpreting and Acting on the PRO Scores From the Patient-reported Outcomes for Personalized Treatment and Care (PROMPT-Care) eHealth System. *Medical Care*. 2019;57(Suppl 1):S85-S91. doi:10.1097/MLR.0000000000001094

13. Hage AM, Gebert P, Kühn F, Pross T, Grittner U, Karsten MM. Examining the Feasibility of an Application-Based Patient-Reported Outcome Monitoring for Breast Cancer Patients: A Pretest for the PRO B Study. *IJERPH*. 2022;19(14):8284. doi:10.3390/ijerph19148284

14. Hoffman L, Benedetto E, Huang H, et al. Augmenting Mental Health in Primary Care: A 1-Year Study of Deploying Smartphone Apps in a Multi-site Primary Care/Behavioral Health Integration Program. *Front Psychiatry*. 2019;10:94. doi:10.3389/fpsyt.2019.00094

15. Kanakubo A, Mizuno M, Asano Y, Inoue Y. Acceptability to making a self-assessment using a tablet computer and health-related quality of life in ambulatory breast cancer patients. *Asia-Pacific Journal of Oncology Nursing*. 2022;9(2):105-112.

16. Katzel JA, Van Den Eeden SK, Liu R, et al. Real-World Use of Electronic Patient-Reported Outcome (ePRO) Tools Integrated in the Electronic Medical Record During Radiation Therapy for Head and Neck Cancer: Feasibility Study. *TPJ*. 2023;27(3):60-67. doi:10.7812/TPP/23.046

17. Lehmann J, De Ligt KM, Tipelius S, et al. Adherence to Patient-Reported Symptom Monitoring and Subsequent Clinical Interventions for Patients With Multiple Myeloma in Outpatient Care: Longitudinal Observational Study. *J Med Internet Res*. 2023;25:e46017. doi:10.2196/46017

18. Mouillet G, Falcoz A, Fritzsch J, et al. Feasibility of health-related quality of life (HRQoL) assessment for cancer patients using electronic patient-reported outcome (ePRO) in daily clinical practice. *Quality of Life Research*. 2021;30(11):3255-3266.

19. Ögmundsdóttir Michelsen H, Sjölin I, Bäck M, et al. Effect of a Lifestyle-Focused Web-Based Application on Risk Factor Management in Patients Who Have Had a Myocardial Infarction: Randomized Controlled Trial. *J Med Internet Res*. 2022;24(3):e25224. doi:10.2196/25224

20. Penedo FJ, Medina HN, Moreno PI, et al. Implementation and Feasibility of an Electronic Health Record–Integrated Patient-Reported Outcomes Symptom and Needs Monitoring Pilot in Ambulatory Oncology. *JCO Oncology Practice*. 2022;18(7):e1100-e1113. doi:10.1200/OP.21.00706

21. Poulose BK, Schwartzman H, Huang LC, et al. Multistakeholder collaborative effort to enhance long-term follow-up in the abdominal core health quality collaborative. *Annals of Surgery Open*. 2021;2(1):e052.

22. Richter JG, Nannen C, Chehab G, et al. Mobile App-based documentation of patient-reported outcomes—3-months results from a proof-of-concept study on modern rheumatology patient management. *Arthritis Research & Therapy*. 2021;23(1):121.

23. Rogausch A, Sigle J, Seibert A, Thüring S, Kochen MM, Himmel W. Feasibility and acceptance of electronic quality of life assessment in general practice: an implementation study. *Health and Quality of Life Outcomes*. 2009;7(1):51.

24. Schoenthaler A, Cruz J, Payano L, et al. Investigation of a mobile health texting tool for embedding patient-reported data into diabetes management (i-Matter): development and usability study. *JMIR formative research*. 2020;4(8):e18554.

25. Steinbauer J, Koller M, Kohl E, Karrer S, Landthaler M, Szeimies R. Quality of life in health care of non‐melanoma skin cancer – results of a pilot study. *J Deutsche Derma Gesell*. 2011;9(2):129-135. doi:10.1111/j.1610-0387.2010.07547.x

26. Väyrynen K, Chen A, Leskelä RL, et al. Introducing standard patient-reported measures (PRMs) into routine maternity care: A pre-implementation qualitative study on women’s perspectives in Finland. *BMC Health Services Research*. 2023;23(1):845.

27. Wiegel J, Seppen BF, Nurmohamed MT, Ter Wee MM, Bos WH. Predictors for response to electronic patient-reported outcomes in routine care in patients with rheumatoid arthritis: a retrospective cohort study. *Rheumatol Int*. 2023;43(4):651-657. doi:10.1007/s00296-023-05278-6

28. Wong D, Cao S, Ford H, et al. Exploring the use of tablet computer-based electronic data capture system to assess patient reported measures among patients with chronic kidney disease: a pilot study. *BMC Nephrol*. 2017;18(1):356. doi:10.1186/s12882-017-0771-7

29. Wright EP, Selby PJ, Crawford M, et al. Feasibility and Compliance of Automated Measurement of Quality of Life in Oncology Practice. *JCO*. 2003;21(2):374-382. doi:10.1200/JCO.2003.11.044

30. Wujcik D, Dudley WN, Dudley M, Gupta V, Brant J. Electronic patient symptom management program to support patients receiving cancer treatment at home during the COVID-19 pandemic. *Value in Health*. 2022;25(6):931-936.
